# Supplementary material
Source: publisher figshare collection journal article supplement (https://plos.figshare.com/articles/dataset/_/9684446)
Supplement: Supplementary file [file 1]

| July 2017                        |                  |          |          |          |                |          |          |                |          |        |          |
|----------------------------------|------------------|----------|----------|----------|----------------|----------|----------|----------------|----------|--------|----------|
| Habitat                          | Cave             |          |          |          | Rocky area     |          |          | Stone fence    |          |        |          |
| Collection / selection (% Total) | 650 / 118 (59%)  |          |          |          | 173 / 30 (16%) |          |          | 284 / 52 (26%) |          |        |          |
| Sample site                      | C2               | C3       | C5       | C9       | R8             | R16      | R17      | S9             | S12      | S16    | S17      |
| Collection / selection           | 243 / 43         | 219 / 40 | 66 / 12  | 122 / 23 | 68 / 11        | -        | 105 / 19 | 133 / 28       | 151 / 24 | -      | -        |
| % (sample site/habitat)          | 37%              | 34%      | 10%      | 19%      | 40%            | -        | 60%      | 47%            | 53%      | -      | -        |
| January 2018                     |                  |          |          |          |                |          |          |                |          |        |          |
| Habitat                          | Cave             |          |          |          | Rocky area     |          |          | Stone fence    |          |        |          |
| Collection / selection           | 1344 / 124 (62%) |          |          |          | 286 / 26 (13%) |          |          | 540 / 50 (25%) |          |        |          |
| Sample site                      | C2               | C3       | C5       | C9       | R8             | R16      | R17      | S9             | S12      | S16    | S17      |
| Collection / selection           | 550 / 51         | 273 / 25 | 521 / 48 | -        | -              | 204 / 18 | 82 / 8   | -              | 296 / 27 | 27 / 3 | 217 / 20 |
| % (sample site/habitat)          | 41%              | 20%      | 39%      | -        | -              | 71%      | 29%      | -              | 55%      | 5%     | 40%      |
