# Supplementary material
Source: publisher figshare collection journal article supplement (https://plos.figshare.com/articles/dataset/_/9684446)
Supplement: Supplementary file [file 1]

| Month          | Location type | # sample sites | # total sandflies | # female sandflies | # tested sandflies (%) | # tested kDNA+ sandflies (%) | Mean T (°C) | Mean %RH |
|----------------|---------------|----------------|-------------------|--------------------|------------------------|------------------------------|-------------|----------|
| <b>Mar '17</b> | Cave          | 3              | 653               | 279                | 274 (98%)              | 15 (5.47%)                   | 21.94       | 49.22    |
|                | Rocky         | 3              | 152               | 67                 | 67 (100%)              | 0 (0%)                       | 23.17       | 47.72    |
|                | Stone fence   | 2              | 424               | 181                | 181 (100%)             | 0 (0%)                       | 22.72       | 47.86    |
|                | Overall       | 8              | 1229              | 527                | 522 (99%)              | 15 (2.87%)                   | 22.61       | 48.32    |
| <b>Apr '17</b> | Cave          | 3              | 752               | 341                | 341 (100%)             | 11 (3.23%)                   | 21.48       | 55.43    |
|                | Rocky         | 2              | 388               | 202                | 200 (99%)              | 5 (2.50%)                    | 21.72       | 57.94    |
|                | Stone fence   | 3              | 855               | 469                | 468 (100%)             | 0 (0%)                       | 22.24       | 53.10    |
|                | Overall       | 8              | 1995              | 1012               | 1009 (100%)            | 16 (1.59%)                   | 21.81       | 55.79    |
| <b>May '17</b> | Cave          | 4              | 907               | 348                | 343 (99%)              | 15 (4.37%)                   | 18.14       | 84.31    |
|                | Rocky         | 2              | 117               | 28                 | 28 (100%)              | 0 (0%)                       | 18.93       | 83.49    |
|                | Stone fence   | 2              | 326               | 121                | 118 (98%)              | 2 (1.69%)                    | 23.74       | 66.56    |
|                | Overall       | 8              | 1350              | 497                | 489 (98%)              | 17 (3.48%)                   | 20.27       | 80.94    |
| <b>Jun '17</b> | Cave          | 4              | 760               | 386                | 386 (100%)             | 9 (2.33%)                    | 17.42       | 83.51    |
|                | Rocky         | 2              | 115               | 41                 | 41 (100%)              | 0 (0%)                       | 17.88       | 83.94    |
|                | Stone fence   | 2              | 229               | 119                | 119 (100%)             | 0 (0%)                       | 20.06       | 70.37    |
|                | Overall       | 8              | 1104              | 546                | 546 (100%)             | 9 (1.65%)                    | 18.45       | 81.53    |
| <b>Jul '17</b> | Cave          | 4              | 650               | 319                | 284 (89%)              | 16 (5.53%)                   | 16.70       | 87.33    |
|                | Rocky         | 2              | 173               | 92                 | 92 (100%)              | 4 (3.53%)                    | 17.12       | 89.37    |
|                | Stone fence   | 2              | 284               | 177                | 170 (96%)              | 6 (4.35%)                    | 17.46       | 81.11    |
|                | Overall       | 8              | 1107              | 588                | 546 (93%)              | 26 (4.76%)                   | 17.09       | 87.31    |
| <b>Aug '17</b> | Cave          | 4              | 410               | 168                | 163 (97%)              | 14 (8.59%)                   | 16.55       | 85.57    |
|                | Rocky         | 2              | 218               | 85                 | 84 (99%)               | 1 (1.19%)                    | 16.84       | 89.90    |
|                | Stone fence   | 2              | 151               | 74                 | 74 (100%)              | 1 (1.35%)                    | 17.61       | 77.90    |
|                | Overall       | 8              | 779               | 327                | 321 (98%)              | 16 (4.98%)                   | 17.00       | 86.46    |
| <b>Sep '17</b> | Cave          | 3              | 308               | 144                | 45 (31%)               | 1 (2.22%)                    | 21.83       | 73.40    |
|                | Rocky         | 3              | 585               | 276                | 101 (37%)              | 0 (0%)                       | 20.42       | 81.62    |
|                | Stone fence   | 2              | 213               | 143                | 43 (30%)               | 0 (0%)                       | 20.60       | 74.35    |
|                | Overall       | 8              | 1106              | 563                | 189 (34%)              | 1 (0.53%)                    | 20.95       | 77.06    |
| <b>Oct '17</b> | Cave          | 4              | 350               | 173                | 167 (97%)              | 8 (4.79%)                    | 20.39       | 74.56    |
|                | Rocky         | 2              | 371               | 187                | 184 (98%)              | 0 (0%)                       | 21.43       | 72.47    |
|                | Stone fence   | 2              | 311               | 141                | 139 (99%)              | 0 (0%)                       | 21.33       | 71.88    |
|                | Overall       | 8              | 1032              | 501                | 490 (98%)              | 8 (1.63%)                    | 21.05       | 73.41    |
| <b>Nov '17</b> | Cave          | 3              | 619               | 273                | 254 (93%)              | 12 (4.72%)                   | 18.19       | 76.79    |
|                | Rocky         | 3              | 351               | 192                | 184 (96%)              | 7 (3.80%)                    | 19.83       | 71.39    |
|                | Stone fence   | 2              | 293               | 160                | 155 (99%)              | 8 (5.16%)                    | 19.72       | 70.93    |
|                | Overall       | 8              | 1263              | 625                | 593 (95%)              | 27 (4.55%)                   | 19.25       | 74.01    |
| <b>Dec '17</b> | Cave          | 3              | 575               | 310                | 284 (62%)              | 15 (5.28%)                   | 21.79       | 56.28    |
|                | Rocky         | 3              | 401               | 255                | 244 (60%)              | 1 (0.41%)                    | 21.32       | 64.04    |
|                | Stone fence   | 2              | 312               | 173                | 171 (73%)              | 1 (0.58%)                    | 20.61       | 49.89    |
|                | Overall       | 8              | 1288              | 738                | 699 (65%)              | 17 (2.43%)                   | 21.24       | 57.80    |
| <b>Jan '18</b> | Cave          | 3              | 1344              | 606                | 373 (62%)              | 7 (1.88%)                    | 20.59       | 44.22    |
|                | Rocky         | 2              | 286               | 126                | 75 (60%)               | 1 (1.33%)                    | 24.30       | 52.60    |
|                | Stone fence   | 3              | 868               | 417                | 303 (73%)              | 4 (1.32%)                    | 17.34       | 53.00    |
|                | Overall       | 8              | 2498              | 1149               | 751 (65%)              | 12 (1.60%)                   | 20.74       | 48.51    |
| <b>Feb '18</b> | Cave          | 3              | 790               | 397                | 345 (87%)              | 16 (4.64%)                   | 22.32       | 37.53    |
|                | Rocky         | 2              | 492               | 226                | 208 (92%)              | 4 (1.92%)                    | 24.17       | 43.85    |
|                | Stone fence   | 3              | 1157              | 714                | 637 (89%)              | 3 (0.47%)                    | 20.19       | 42.06    |
|                | Overall       | 8              | 2439              | 1337               | 1190 (89%)             | 23 (1.93%)                   | 22.23       | 40.24    |
| <b>Year</b>    | Cave          |                | 8118              | 3744               | 3259 (87%)             | 139 (4.27%)                  | 19.92       | 67.35    |
|                | Rocky         |                | 3649              | 1777               | 1508 (85%)             | 25 (1.53%)                   | 20.58       | 69.86    |
|                | Stone fence   |                | 5423              | 2889               | 2578 (89%)             | 23 (0.97%)                   | 20.54       | 63.25    |
|                | Overall       |                | 17190             | 8410               | 7345 (87%)             | 187 (2.55%)                  | 20.35       | 67.62    |

T=temperature

%RH = % relative humidity
